# Supplementary material for: Carbon fibers coated with covalent organic framework for online in-tube solid-phase microextraction of tetrabromobisphenol A derivatives in water
Source: Research Square preprint supplement (doi:10.21203/rs.3.rs-7904953/v1), 2025-11-10
Supplement: Supplementary file 1 [file 5f7e08bbf4a99c97dfc21cab.docx]

**Supplementary Materials**

**Carbon fibers coated with covalent organic framework for online in-tube solid-phase microextraction of tetrabromobisphenol A derivatives in water**

Qiong Jiang1,[[1]](#footnote-1)*, Ziyi Xu2, Ting Li3, Huixia Zhang1, Juanjuan Feng2, Min Sun2,[[2]](#footnote-2)**

1 *College of Plant Protection, Gansu Agricultural University/ Biocontrol Engineering Laboratory of Crop Diseases and Pests of Gansu Province, Lanzhou, Gansu Province, 730070, China*

2 *Key Laboratory of Interfacial Reaction & Sensing Analysis in Universities of Shandong, School of Chemistry and Chemical Engineering, University of Jinan, Jinan, 250022, China*

3 *Weifang Binhai Ecological Environment Monitoring Center, Weifang, 261108, China*

**2 Experimental**

**2.1 Materials and reagents**

Polyetheretherketone (PEEK) tube (0.75 mm i.d., 1.5 mm o.d.) and carbon fibers (CFs) were separately obtained from Changzhou Youwoshi Plastic Products Co., Ltd. (Changzhou, China) and Japan Toho Chemical Industry Co., Ltd. (Japan). 1,3,5-Tris(4-aminophenyl)benzene (TAPB) and 1,4-phthalaldehyde (TPA) were obtained from Jilin Zhongke Yanshen Technology Co., Ltd. (Jilin, China). TBBPA-DME, TBBPA-BAE, and TBBPA-BDBPE were obtained from Shanghai Aladin Biochemical Technology Co., Ltd. (Shanghai, China).

**2.2 Apparatus**

All chromatographic tests were performed on an Agilent 1260 HPLC-DAD system (Agilent Technologies, Santa Clara, CA, USA) equipped with Zorbax C18 column (250×4.6 mm i.d., 5 μm). A P102 pump from Dalian Elite Analytical Instruments Co., Ltd. (Dalian, China), was used to deliver sample solution through extraction tube. Field emission scanning electron microscope (FE-SEM, Carl Zeiss, Germany), Specific surface area analyzer (Micromeritics Instrument Corp., USA) and X-ray diffractometer (XRD, Rigaku Corp., Japan) were used to characterize the material.

**2.3 Chromatographic conditions**

All chromatographic separation was performed with 1.0 mL min⁻¹ of mobile phase at 25 °C of column temperature. The detection wavelength was 210 nm. In 5.0 min, the mobile phase consisted of 70% ACN and 30% water; it gradually changed to 100% ACN between 5-10 min. The general time was 15 min.

**2.4 Sample preparation**

A stock solution of TBBPA derivatives with a concentration of 5.0 mg L⁻¹ was prepared in methanol. A working solution of TBBPA derivatives with a concentration of 5.0 μg L⁻¹ was achieved by diluting stock solution with water.

1. * Corresponding author. *E-mail address*: [jiangqiong@gsau.edu.cn](mailto:jiangqiong@gsau.edu.cn) (Q. Jiang). [↑](#footnote-ref-1)
2. ** Corresponding author. *E-mail address*: [chm_sunm@ujn.edu.cn](mailto:chm_sunm@ujn.edu.cn); [sunmin-123456@163.com](mailto:sunmin-123456@163.com) (M. Sun). [↑](#footnote-ref-2)
